# Supplementary material
Source: PubMed Central journal article supplement (PMC10991911)
Supplement: 262_2021_3126_MOESM1_ESM.pdf [file 262_2021_3126_MOESM1_ESM.pdf]

Supplementary Table 1

| <b>List of antibodies</b>              |              |                         |                 |
|----------------------------------------|--------------|-------------------------|-----------------|
| <b>Antibody</b>                        | <b>Clone</b> | <b>Source</b>           | <b>Catalog#</b> |
| Flowcytometry                          |              |                         |                 |
| NKp46                                  | 9E2          | Biologend               | 331908          |
| CD16                                   | 3G8          | Biologend               | 302026          |
| NKG2D                                  | 1D11         | Biologend               | 320818          |
| NKG2A                                  | S1940004C    | Biologend               | 375108          |
| CD69                                   | FN50         | Biologend               | 310903          |
| CD56                                   | HCD56        | Biologend               | 318310          |
| Immunoblotting                         |              |                         |                 |
| Hif-1 $\alpha$                         | D2U3T        | Cell Signaling          | 14179           |
| p70 S6 Kinase                          | Polyclonal   | Cell Signaling          | 9202            |
| Phospho-p70 S6 Kinase (Thr389)         | Polyclonal   | Cell Signaling          | 9205            |
| $\beta$ - Actin                        | 15G5A11/E2   | ThermoFisher Scientific | MA1-140         |
| Anti-ERK1 + ERK2 antibody              | Polyclonal   | Abcam                   | ab17942         |
| Anti-ERK1 + ERK2 (phospho T202 + Y204) | Polyclonal   | Abcam                   | ab214362        |
| ELISA                                  |              |                         |                 |
| UltraLeaf anti-NKp46 ab                | 9E2          | Biologend               | 331947          |
| UltraLeaf anti-CD16 ab                 | 3G8          | Biologend               | 302057          |

Supplementary Fig.1

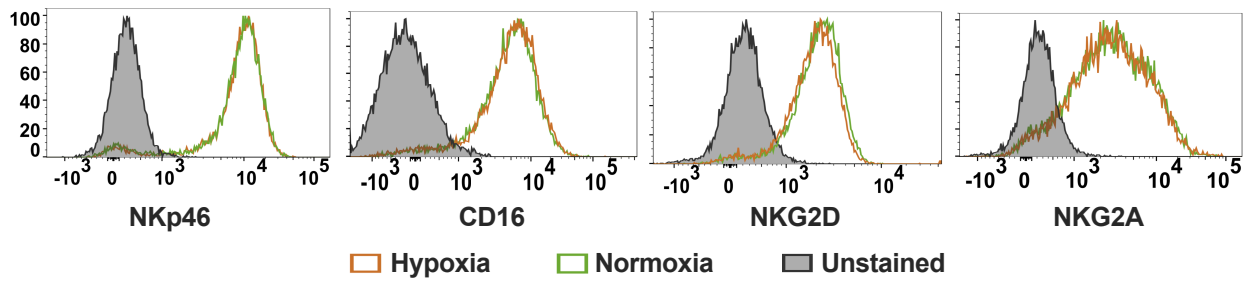

### Characterization of NK cell receptors on NKL cells in hypoxia

NKL cells in presence of IL-2 were exposed to 21% or 1% O<sub>2</sub> for 24 h. Expression of surface receptors NKG2D, NKp46, CD16 and NKG2A was analyzed by flowcytometry. Representative histograms of expression of these receptors on NKL cells is shown.

Supplementary Fig.2

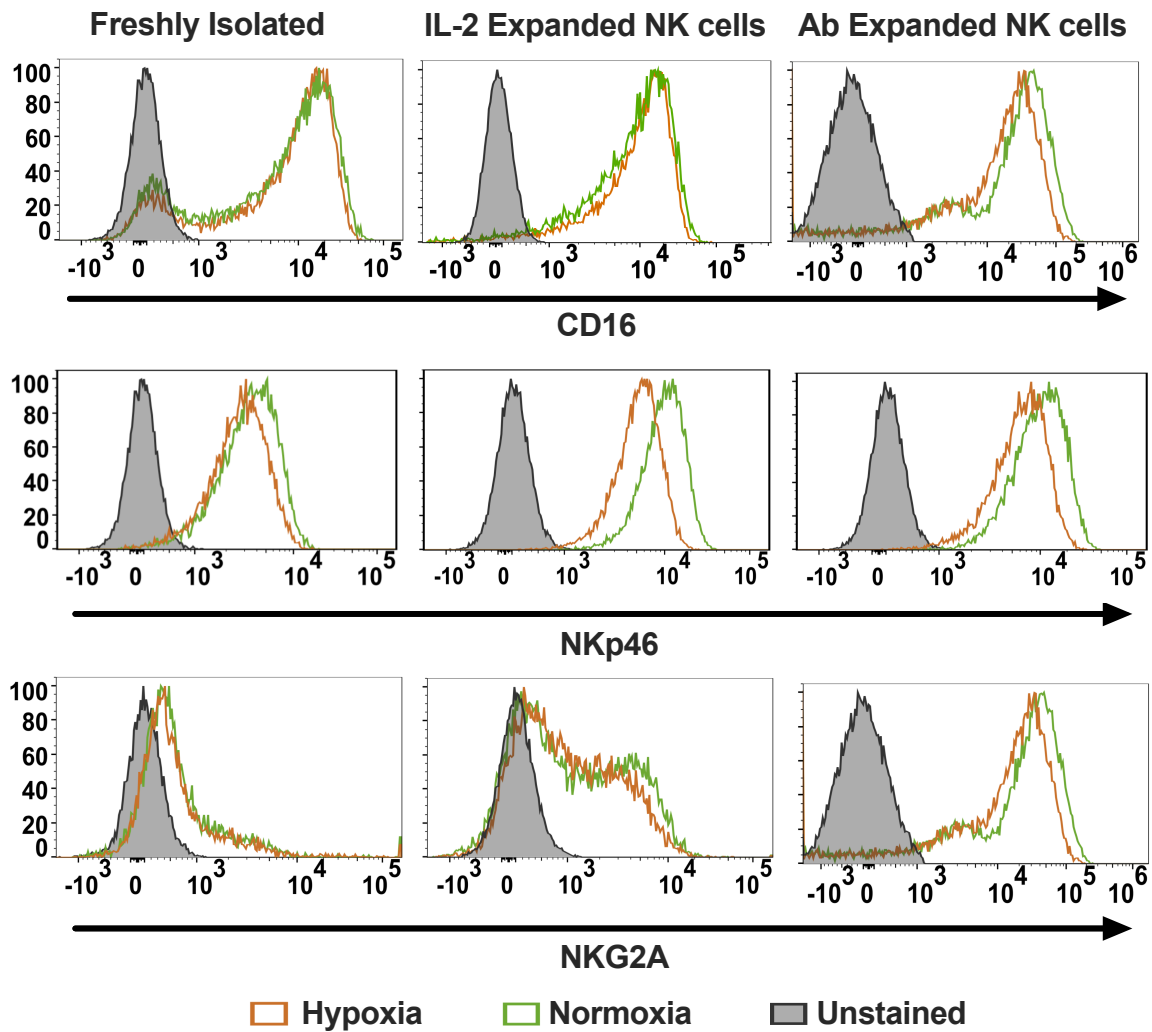

#### Characterization of NK cell receptors on PBMC derived NK cells in hypoxia

Freshly isolated NK cells and ex vivo expanded NK cells were stimulated with IL-2 and incubated in 21% O<sub>2</sub> or 1% O<sub>2</sub> for 72 h. Expression of surface receptors was analyzed by flowcytometry as described in the materials and methods. Representative histograms of CD16, NKp46 and NKG2A expression on freshly isolated NK cells, IL-2 expanded NK cells and antibody expanded NK cells are shown.
